# Supplementary material for: Post-Mortem Detection of SARS-CoV-2 RNA in Long-Buried Lung Samples
Source: MDPI journal article supplement (doi:10.3390/diagnostics11071158), 2021-06-24

## Supplementary material

**Table S1.** Socio-demographic and clinical-pathological features of COVID-19 patients

| Clinical Findings                           |                                       |                         |         |
|---------------------------------------------|---------------------------------------|-------------------------|---------|
|                                             | Old Tissues                           | Fresh Tissues           |         |
|                                             | (16 Samples)                          | (2 Samples)             |         |
| Age (years)                                 | 83.5                                  | 75.5                    |         |
| Sex                                         | 8M, 8F                                | 2F                      |         |
| Male (%)                                    | 8 (50%)                               | 0 (0%)                  |         |
| Female (%)                                  | 8 (50%)                               | 2 (100%)                |         |
| <b>Comorbidities</b>                        |                                       |                         |         |
| Hypertension                                | 11 (68.75%)                           | 2 (100%)                |         |
| Diabetes                                    | 5 (31.25%)                            | 1 (50%)                 |         |
| Chronic pulmonary diseases                  | 2 (12.5%)                             | ---                     |         |
| Obesity (BMI > 30)                          | 3 (18.75%)                            | ---                     |         |
| Cardiovascular diseases                     | 11 (68.75%)                           | ---                     |         |
| Chronic renal diseases                      | 3 (18.75%)                            | ---                     |         |
| Cancer                                      | 3 (18.75%)                            | ---                     |         |
| Alzheimer's disease                         | 1 (6.25%)                             | ---                     |         |
| Burial time (days)                          | 50.19 (24 – 78)                       | 3                       |         |
| Laboratory Findings (CI 95%)                |                                       |                         |         |
|                                             | First exams after COVID-19 positivity | Last exams before death | P-value |
| Redcells (x 10 <sup>6</sup> /μL)            | 4.49 (4.04 - 4.94)                    | 4.12 (3.66 - 4.58)      | 0,219   |
| Hemoglobin (g/dL)                           | 12.64 (11.28 - 14.00)                 | 11.75 (10.46 - 13.05)   | 0,303   |
| Hematocrit (%)                              | 38.85 (34.72 - 42.98)                 | 36.17 (32.19 - 40.16)   | 0,308   |
| Platelets (10 <sup>3</sup> /μL)             | 254.3 (175.49 - 333.11)               | 160.45 (96.37 - 224.52) | 0,052   |
| White Blood Cells (10 <sup>3</sup> /μL)     | 18.8 (2.98 - 40.57)                   | 12.1 (6.8 - 17.34)      | 0,513   |
| Neutrophils                                 | 8.2 (3.68 - 12.74)                    | 10.8 (5.31 - 16.33)     | 0,415   |
| Lymphocytes                                 | 0.99 (0.55 - 1.42)                    | 0.82 (0.38 - 1.26)      | 0,549   |
| <b>Neutrophils/Lymphocyte Ratio</b>         | 8,28                                  | 13,17                   | NA      |
| C-reactive protein (mg/L)                   | 159.5 (56.75 - 262.3)                 | 84.71 (17.44 - 186.9)   | 0,258   |
| Prothrombin time (sec)                      | 12.96 (9.04 - 16.87)                  | 18.46 (6.89 - 30.02)    | 0,308   |
| Prothrombin activation (%)                  | 81.56 (61.87 - 101.2)                 | 72.71 (41.85 - 103.6)   | 0,573   |
| International Normalized Ratio (INR)        | 1.23 (0.98 - 1.48)                    | 1.6 (0.59 - 2.62)       | 0,419   |
| Partial thromboplastin time (sec)           | 28.79 (26.45 - 31.13)                 | 37.86 (25.12 - 50.60)   | 0,135   |
| D-dimer (ng/mL)                             | 754.1 (309.4 - 1199)                  | 845.7 (474.5 - 1217)    | 0,711   |
| Erythrocyte Sedimentation Rate (ESR) (mm/h) | 92.4 (50.21 - 134.6)                  | 56 (29.44 - 141.4)      | 0,214   |
| Fibrinogen (mg/dL)                          | 595.9 (421.5 - 770.2)                 | 435.9 (291 - 580.8)     | 0,12    |
| LDH (U/L)                                   | 911.9 (561.3 - 1262)                  | 963.9 (385.9 - 1542)    | 0,859   |

**Figure S1.** SARS-CoV 2 viral extraction from pulmonary tissues work flow.

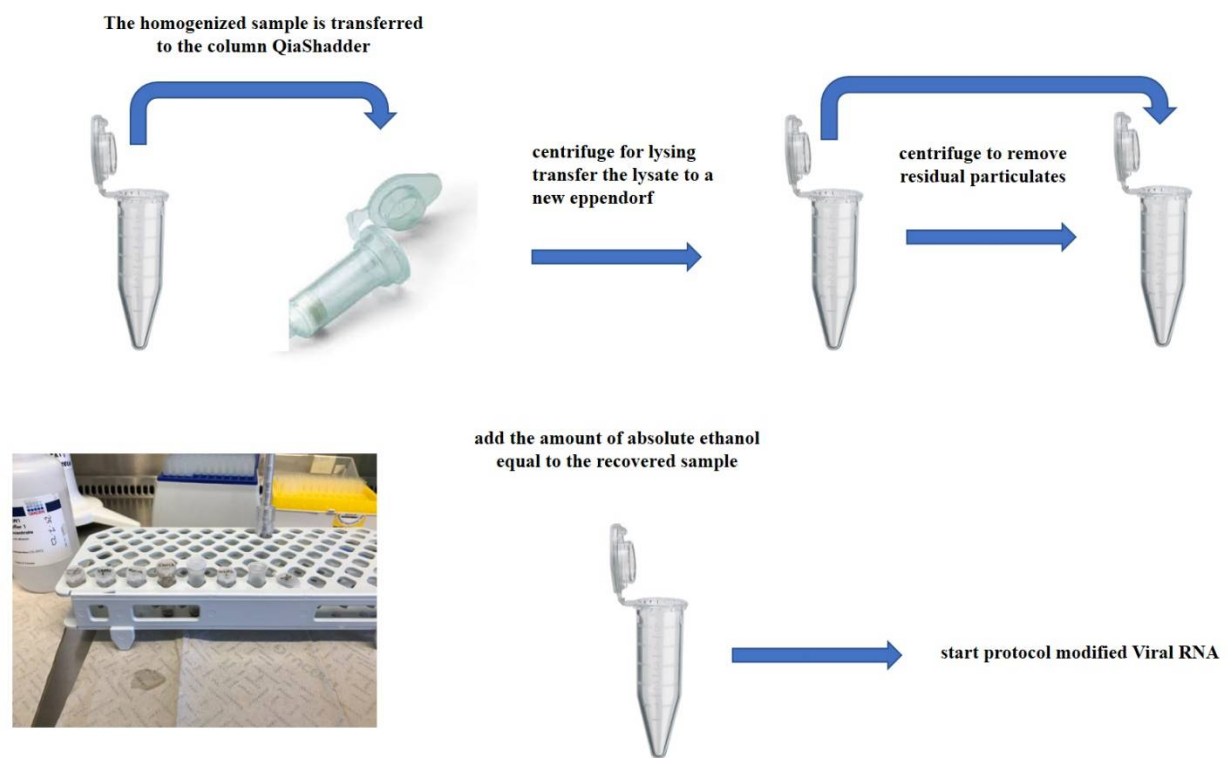

**Figure S2.** A) RT-qPCR detection of SARS-CoV-2 N2 gene in non-infected samples. B) RT-qPCR detection of human GAPDH in control samples and lung tissues to assess the validity of the extraction protocol.

A)

|   | Name                          | Ct    |
|---|-------------------------------|-------|
| A | SARS-CoV2 N2 Lung Method 1    | NA    |
| B | SARS-CoV2 N2 Lung Method 1    | NA    |
| C | SARS-CoV2 N2 Primers CTRL Pos | 20.21 |
| D | SARS-CoV2 N2 Primers CTRL Pos | 18,29 |
| E | SARS-CoV2 N2 NTC              | NA    |

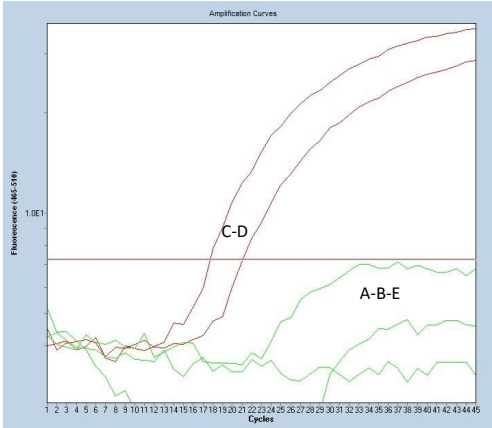

Legend: A-B) Analysis of SARS-CoV-2 N2 gene expression in normal lung (performed in duplicate); C-D) Analysis of SARS-CoV-2 N2 genes in a positive control obtained for a patient with a confirmed diagnosis of COVID-19 infection (performed in duplicate); E) Non-Template Control.

B)

|   | Name                        | Ct    |
|---|-----------------------------|-------|
| A | GAPDH Negative Sample 1     | NA    |
| B | GAPDH Negative Sample 1     | NA    |
| C | GAPDH Lung Method 2         | 34.80 |
| D | GAPDH Lung Method 2         | 36.86 |
| G | GAPDH Lung Method 1         | 27.98 |
| H | GAPDH Lung Method 1         | 26.67 |
| I | GAPDH MG-63 Human Cell Line | 17.46 |
| F | GAPDH NTC                   | NA    |

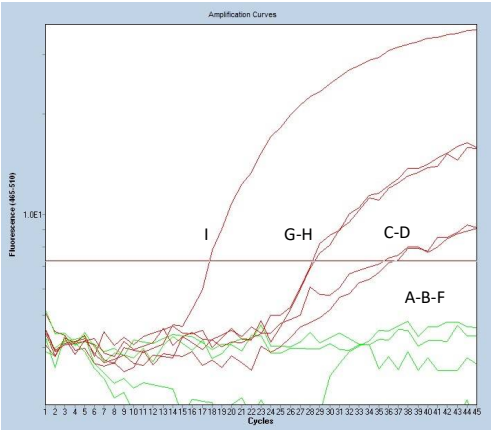

Legend: A-B) Negative samples consisting of all the buffers and components used during the extractions, tested to verify any possible cross-contamination. C-D-G-H) RNA extracted from a lung specimen obtained using two different

methods (i.e. samples kept at room temperature or in ice) and obtained from a patient negative to COVID-19 infection.

**Figure S3.** A) Pearson’s correlation matrix between the cDNA amount and the ddPCR results obtained for GAPDH and SARS-CoV-2 N2 gene, from red to blue the increasing statistical significance and B) *p*-value relative to the matrix, *p*-value ≤0.05.

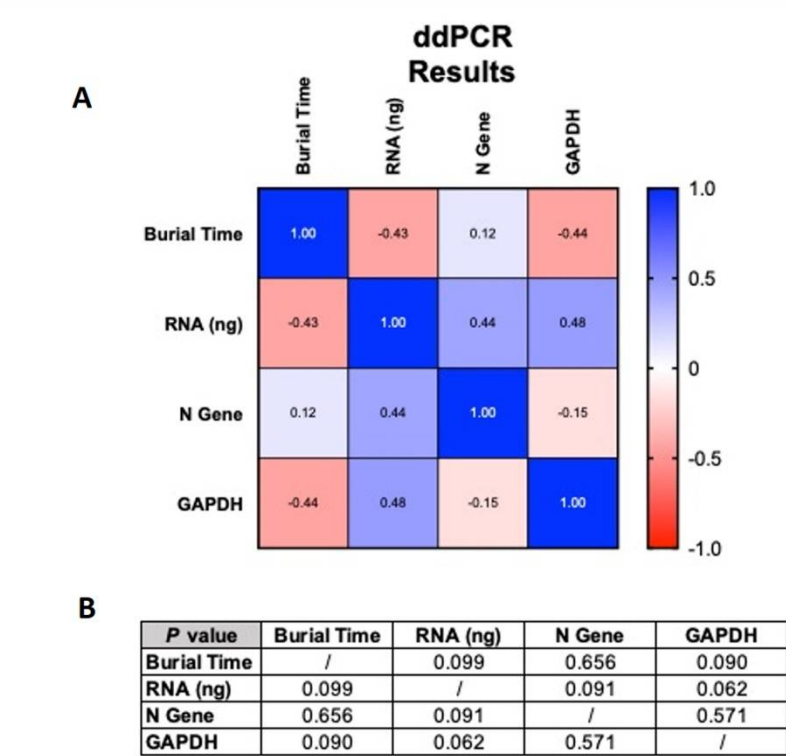

**Figure S4.** Electropherograms of SARS-CoV-2 fragments. A) SARS-CoV-2 N gene sequence; B) SARS-CoV-2 Spike gene sequence; SARS-CoV-2 c) Spike/Orf3a gene sequence. N and Spike sequences were aligned with the reference genome MW041156, while the Spike/Orf3a sequence was aligned with the reference genome MT077125.

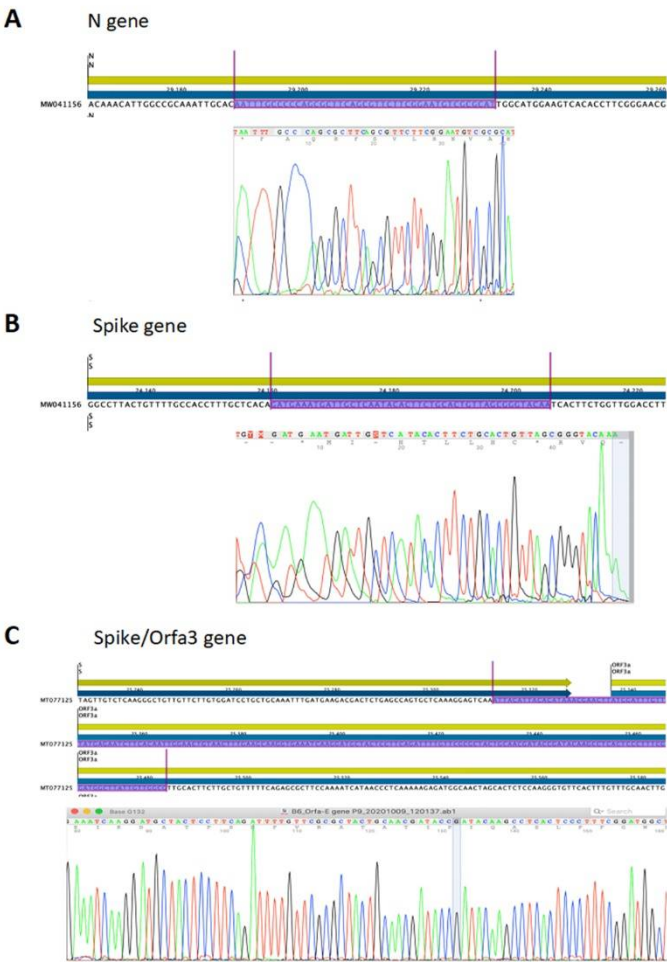

Supplement: s1 [file s1]
